# Supplementary material
Source: PubMed Central journal article supplement (PMC5053144)
Supplement: jciinsight-1-89362-s001.pdf [file jciinsight-1-89362-s001.pdf]

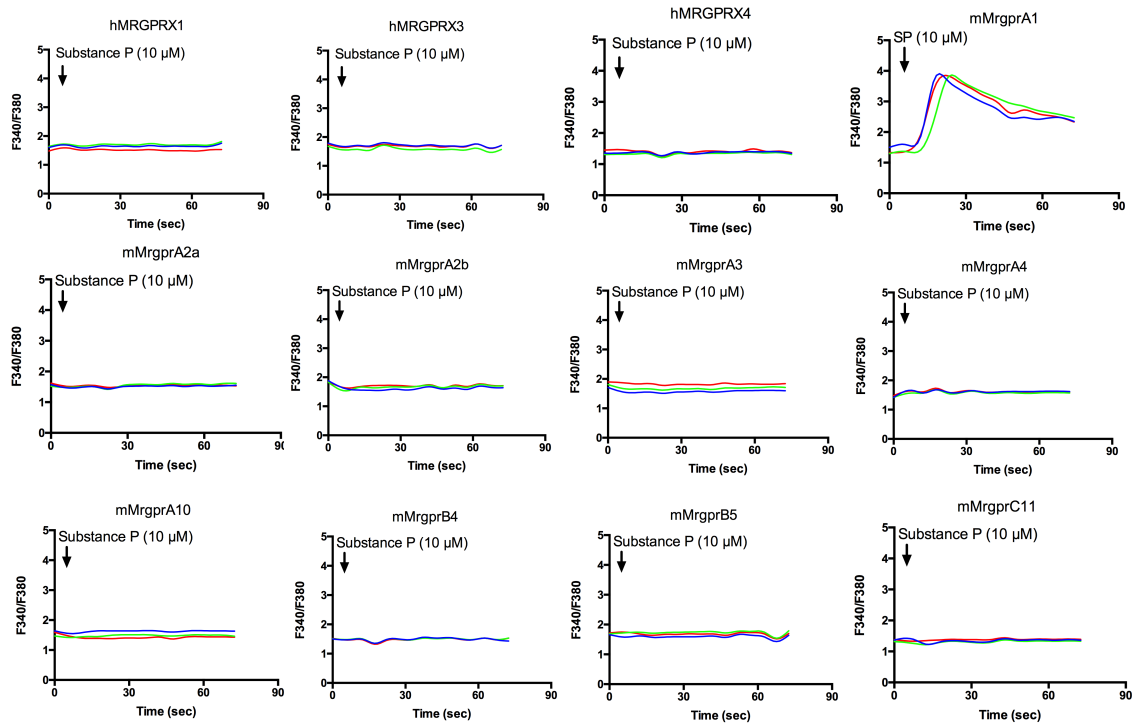

**Supplementary figure 1. SP activates HeLa cells transfected with mouse**

**MrgprA1 but not other Mrgprs. HeLa cells were transfected with cDNAs**

encoding mouse and human Mrgprs. Intracellular calcium  $[Ca^{2+}]_i$  was determined by ratiometric Fura-2 imaging after addition of SP. Each trace represents the response of a different cell. The studies in the individual panels were performed at least twice.

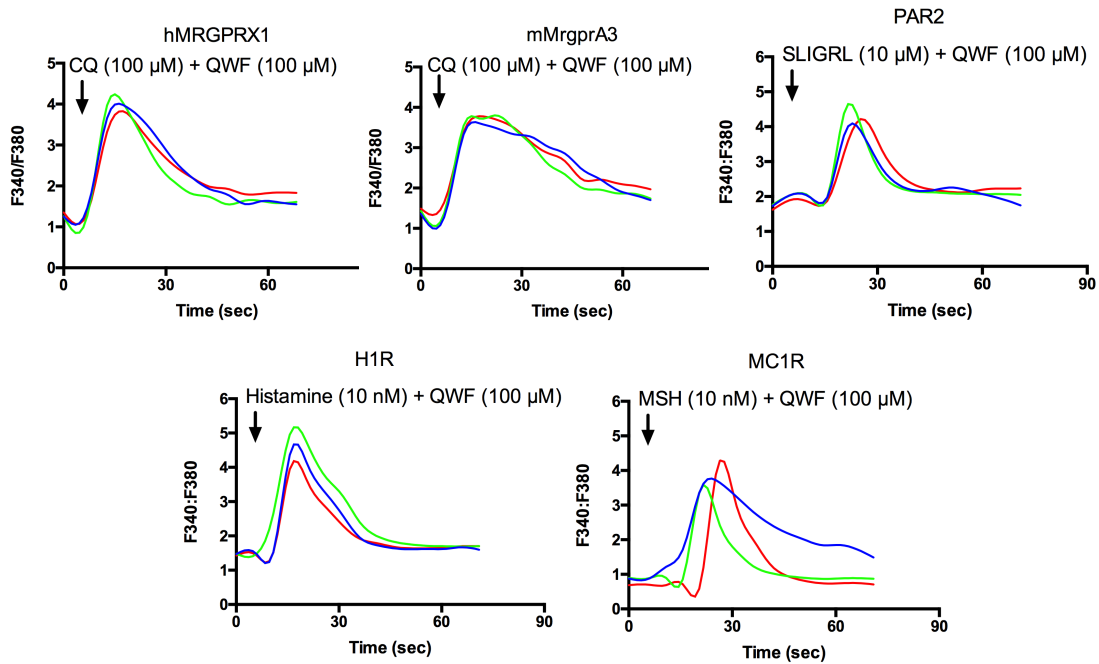

**Supplementary figure 2. Specificity of QWF.** QWF has no effect on other receptors involved in itch, including chloroquine (CQ) activation of MRGPRX1 or MrgprA3, SLIGRL activation of PAR2 or melanocyte stimulating hormone (MSH) on melanocortin-1, a non-itch receptor. HeLa cells were transfected with cDNAs of human MRGPRX1, mouse MrgprA3, PAR2, histamine-1 receptor, and melanocortin-1 receptor. Intracellular calcium  $[Ca^{2+}]_i$  was determined by ratiometric Fura-2 imaging. Each trace represents the response of a different cell. The studies in the individual panels were performed at least twice.

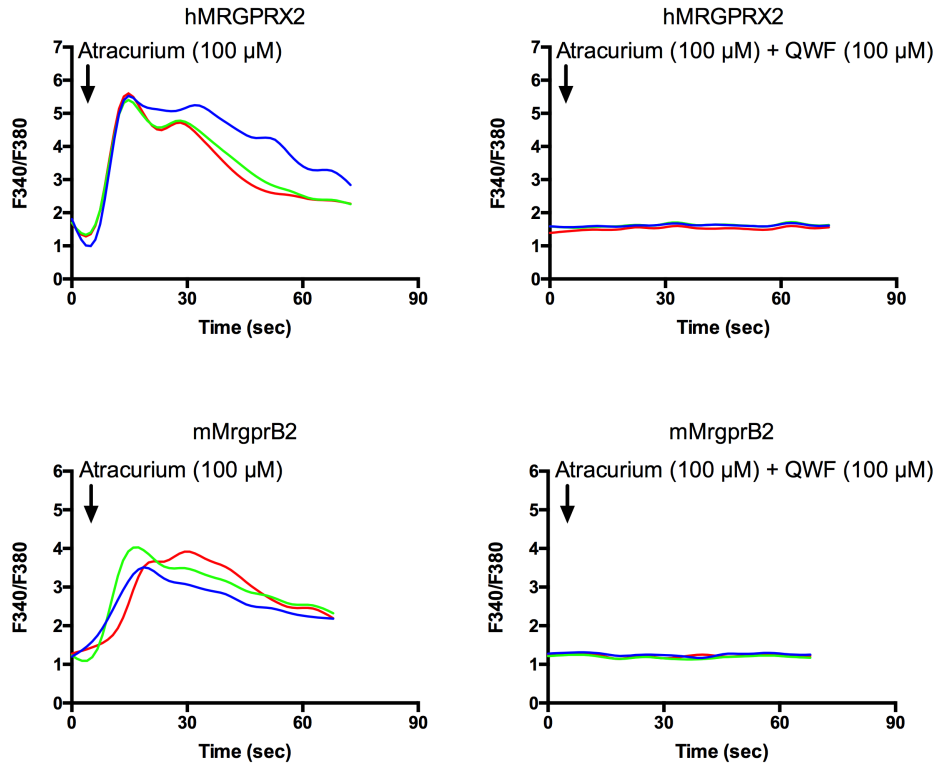

**Supplementary figure 3. QWF inhibits activation of human MRGPRX2 and mouse MrgrB2 by atracurium.** HeLa cells were transfected with cDNAs encoding mouse MrgrB2. A stably transfected HEK-293 cell line was used for human MRGPRX2. Intracellular calcium  $[Ca^{2+}]_i$  was determined by ratiometric Fura-2 imaging after addition of atracurium and QWF. Each trace represents the response of a different cell and the studies in the individual panels were performed at least twice.

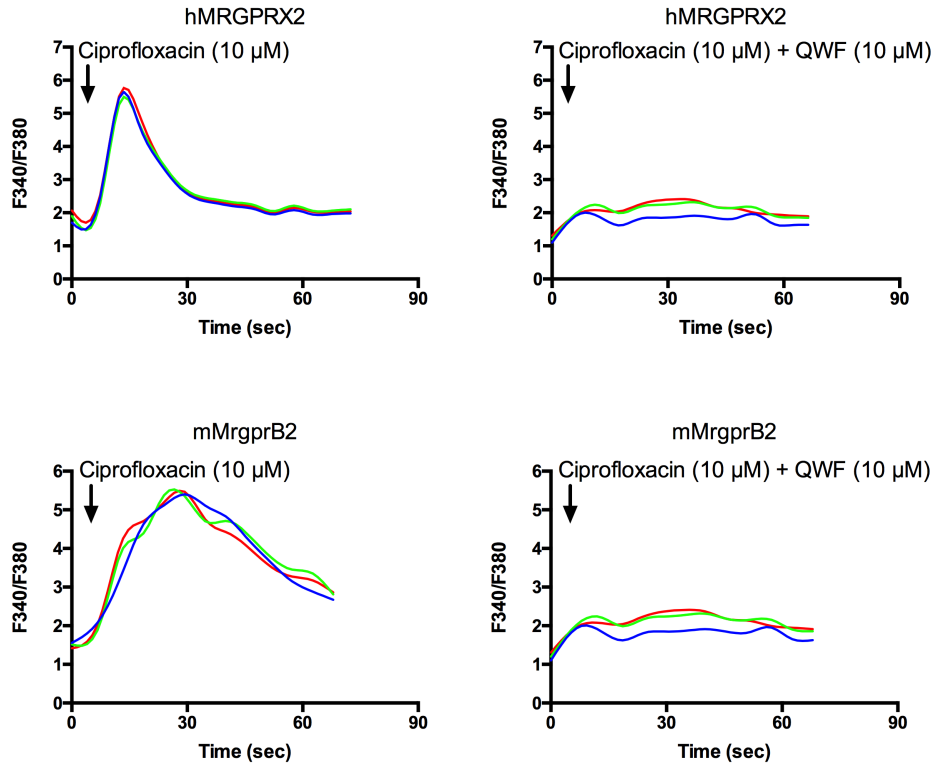

**Supplementary figure 4. QWF inhibits activation of human MRGPRX2 and mouse MrgrB2 by ciprofloxacin.** HeLa cells were transfected with cDNAs encoding mouse MrgrB2. A stably transfected HEK-293 cell line was used for human MRGPRX2. Intracellular calcium  $[Ca^{2+}]_i$  was determined by ratiometric Fura-2 imaging after addition of ciprofloxacin and QWF. Each trace represents the response of a different cell and the studies in the individual panels were performed at least twice.

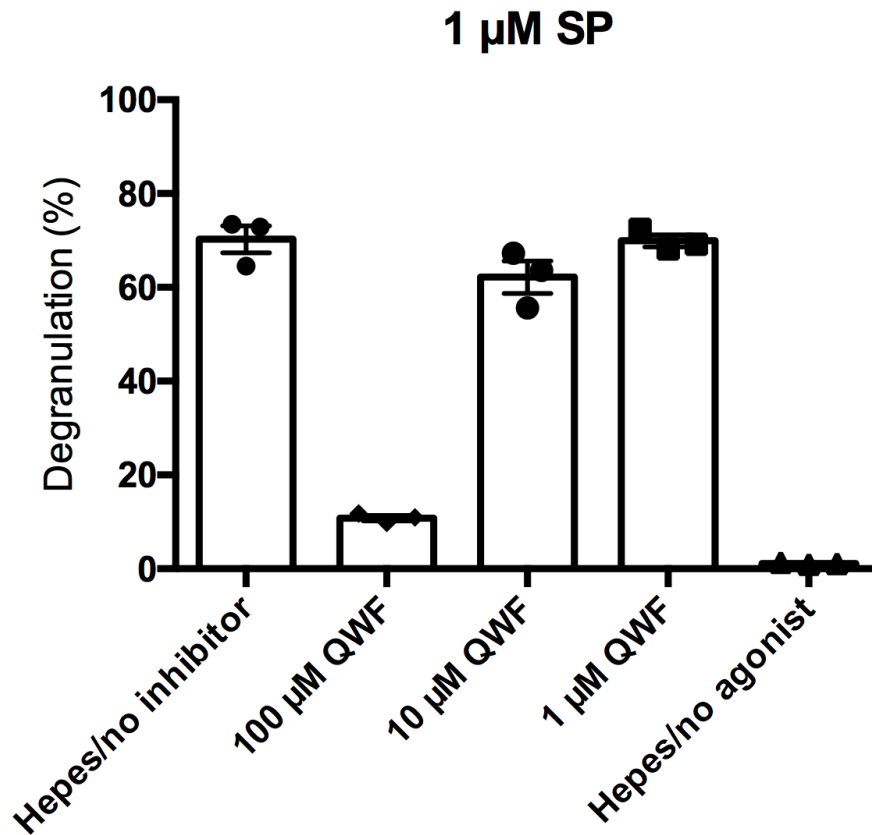

**Supplementary figure 5. The effect of QWF on mast cell degranulation.** The level of mast cell degranulation was assessed by the release of  $\beta$ -hexosaminidase in mast cell granules, quantified by the level of its substrate *p*-nitrophenyl *N*-acetyl- $\beta$ -<sub>D</sub>-glucosamide (PNAG) digested in a colorimetric assay that was performed three times.

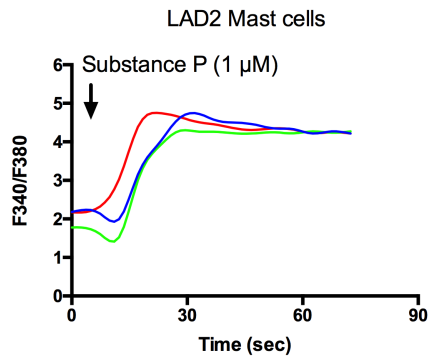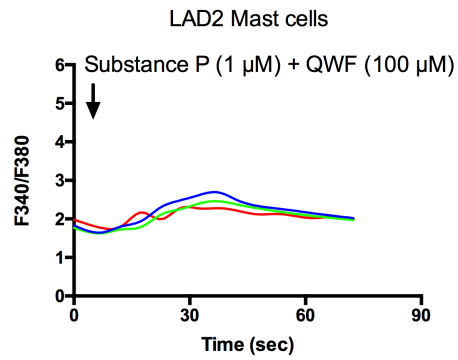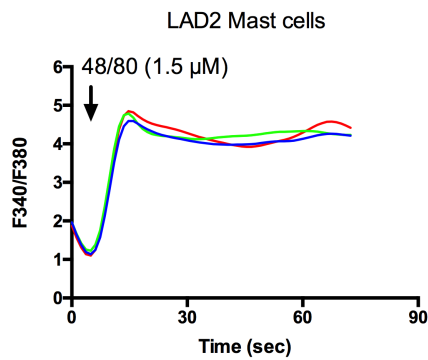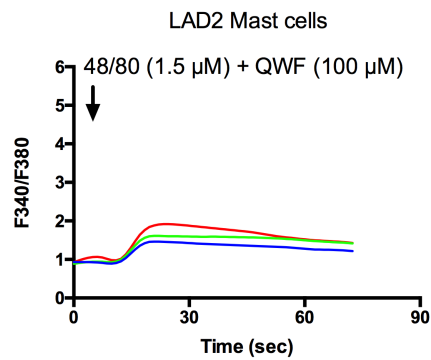

**Supplementary figure 6. QWF inhibits SP and compound 48/80 induced calcium  $[Ca^{2+}]_i$  responses in human LAD2 mast cells.** Intracellular calcium  $[Ca^{2+}]_i$  was determined by ratiometric Fura-2 imaging of human LAD2 mast cells. Each trace represents the response of a different cell and the studies in the individual panels were performed at least twice.
